# Supplementary material for: Understanding Factors That Influence Pest Risk in Olive Production
Source: MDPI journal article supplement (doi:10.3390/su152316445), 2023-11-30
Supplement: s1 [file s1]

Archive with 2 entries (2 files):
- 01-ARTICLE REVIEW INSTRUMENTS TO PUBLISH.xlsx
- PRISMA_2020_checklist.pdf
