# Supplementary material for: Understanding Factors That Influence Pest Risk in Olive Production
Source: MDPI journal article supplement (doi:10.3390/su152316445), 2023-11-30
Supplement: s1 [file s1 › 01-ARTICLE REVIEW INSTRUMENTS TO PUBLISH.xlsx]

## Sheet: Selected research
	Selected research
	Title	Author	Name of the scientific journal	Country	Year of publication	Quartile	DOI
1	Persistence of Metarhizium brunneum (Ascomycota: Hypocreales) in the Soil Is Affected by Formulation Type as Shown by Strain-Specific DNA Markers	Iker Hernández 1,* , Clara Sant 1, Raquel Martínez 1, Marta Almazán 1, Marta Caminal 1, Víctor Quero 1, Mohammed El-Adak 1, Albert Casanova 1, Inmaculada Garrido-Jurado 2 , Meelad Yousef-Yousef 2 , Enrique Quesada-Moraga 2, José Manuel Lara 1 and Carolina Fernández 1	Journal of Fungi	Switzerland	2023	Q1	https://doi.org/10.3390/jof9020229
2	Climate stressors modulate interannual olive yield at province level in Italy: A composite index approach to support crop management	Arianna Di Paola, Edmondo Di Giuseppe, Andrew Paul Gutierrez, Luigi Ponti, Massimiliano Pasqui	Journal of Agronomy and Crop Science.	Italy	2023	Q1	https://doi.org/10.1111/jac.12636
3	Pest categorisation of Nipaecoccus viridis	Claude Bragard, Paula Baptista, Elisavet Chatzivassiliou, Francesco Di Serio, Paolo Gonthier, Josep Anton Jaques Miret, Annemarie Fejer Justesen, Christer Sven Magnusson, Panagiotis Milonas, Juan A Navas-Cortes, Stephen Parnell, Roel Potting, Philippe Lucien Reignault, Emilio Stefani, Hans-Hermann Thulke, Wopke Van der Werf, Antonio Vicent Civera, Jonathan Yuen, Lucia Zappalà, Jean-Claude Grégoir…	EFSA Journal	United Kingdom	2023	Q1	https://doi.org/10.2903/j.efsa.2023.7770
4	Prays oleae (Bernard), its potential predators and biocontrol depend on the structure of the surrounding landscape	Susana Pascual , Marta Ortega , María Villa	Biological Control	United States	2022	Q1	https://doi.org/10.1016/j.biocontrol.2022.105092
5	Socio-Economic Risks Posed by a New Plant Disease in the Mediterranean Basin	by Gianluigi Cardone 1,Michele Digiaro 1,Khaled Djelouah 1,Michel Frem 1,2,3,*ORCID,Cosimo Rota 1ORCID,Alessia Lenders 4 andVincenzo Fucilli 3	Diversity	Switzerland	2022	Q1	https://doi.org/10.3390/d14110975
6	The causes and consequences of pest population variability in agricultural landscapes	Daniel Paredes, Jay A. Rosenheim, Daniel S. Karp	Ecological Applications	United States	2022	Q1	https://doi.org/10.1002/eap.2607
7	Southern Range Expansion of the Emerald Ash Borer, Agrilus planipennis, in Russia Threatens Ash and Olive Trees in the Middle East and Southern Europe Open Access	Orlova-Bienkowskaja, M.J., Bieńkowski, A.O.	Forests	Switzerland	2022	Q1	https://doi.org/10.3390/f13040541
8	FUNGI OBTAINED FROM OLIVE TWIG DIEBACK AND ADULTS OF THE ALIEN PEST XYLOSANDRUS COMPACTUS (EICHHOFF) (COLEOPTERA CURCULIONIDAE SCOLYTINAE)	SALVATORE VITALE a - PAOLO TOCCAFONDI b - LAURA LUONGO a - FRANCESCO BINAZZI b MARIANGELA PETRUCCI a - VALERIA FRANCARDI b - SILVIA LANDI b - LUCREZIA GIOVANNINI b SAURO SIMONI b - PIO FEDERICO ROVERSI c* - FABRIZIO PENNACCHIO	Redia	Italy	2022	Q3	http://dx.doi.org/10.19263/REDIA-105.22.25
9	Measurement of CO2 Emissions in the Semi - Arid Region Conditions in the Soil where the Olive Plant Grows | [Yarı Kurak Bölge Koşullarında Zeytin Bitkisinin Yetiştiği Toprakta Karbondioksit Emisyonunun Ölçülmesi]	Sakin, E., Bellitürk, K., Çelik, A.	Journal of Tekirdag Agricultural Faculty	Turkey	2021	Q3	https://doi.org/10.33462/jotaf.842302
10	Ecological niche models of biotic interactions predict increasing pest risk to olive cultivars with changing climate	Ashraf, U., Chaudhry, M.N., Peterson, A.T.	Ecosphere	United States	2021	Q1	https://doi.org/10.1002/ecs2.3714
11	Potential socio-economic impact of xylella fastidiosa in the near east and north africa (Nena): Risk of introduction and spread, risk perception and socio-economic effects	Cardone, G., Digiaro, M., Djelouah, K., (...), Rota, C., Yaseen, T.	New Medit	Italy	2021	Q2	https://doi.org/10.30682/nm2102c
12	Is Xylella fastidiosa a serious threat to European forests?	Desprez-Loustau, M.-L., Balci, Y., Cornara, D., (...), Robin, C., Jacques, M.-A.	Forestry	United Kingdom	2021	Q1	https://doi.org/10.1093/forestry/cpaa029
13	Resource-dependent mutual association with sap-feeders and a high predation rate in the ant Crematogaster scutellaris: help or harm in olive pest control?	Frizzi, F., Masoni, A., Ottonetti, L., Tucci, L., Santini, G.	BioControl	Netherlands	2020	Q1	https://doi.org/10.1007/s10526-020-10028-9
14	Distribution of Bactrocera oleae (Rossi, 1790) throughout the Iberian Peninsula based on a maximum entropy modelling approach	Benhadi-Marín, J., Santos, S.A.P., Baptista, P., Pereira, J.A.	Annals of Applied Biology	United Kingdom	2020	Q2	https://doi.org/10.1111/aab.12584
15	Impact of Xylella fastidiosa subspecies pauca in European olives	Schneider, K., van der Werf, W., Cendoya, M., ...Vicent, A., Lansink, A.O.	Proceedings of the National Academy of Sciences of the United States of America	United States	2020	Q1	https://doi.org/10.1073/pnas.1912206117
16	Low-cost IoT remote sensor mesh for large-scale orchard monitorization	Varandas, L., Faria, J., Gaspar, P.D., Aguiar, M.L.	Journal of Sensor and Actuator Networks	Switzerland	2020	Q1	https://doi.org/10.3390/jsan9030044
17	Growth, DNA damage and biochemical toxicity of cyantraniliprole in earthworms (Eisenia fetida)	Qiao, Z., Zhang, F., Yao, X., ...Zhang, J., Jiang, X.	Chemosphere	United Kingdom	2019	Q1	https://doi.org/10.1016/j.chemosphere.2019.07.059
18	Favourability for the presence of wild rabbit warrens in motorway verges: Implications for the spread of a native agricultural pest species	Rouco, C., Farfán, M.Á., Olivero, J., ...Villafuerte, R., Delibes-Mateos, M.	Ecological Indicators	Netherlands	2019	Q1	https://doi.org/10.1016/j.ecolind.2019.04.087
19	Exposure of bombus terrestris l. To three different active ingredients and two application methods for olive pest control	Varikou, K., Garantonakis, N., Birouraki, A.	Entomologia Generalis	Germany	2019	Q1	DOI : 10.1127/entomologia/2019/0706
20	Pest categorisation of non-EU Cicadomorpha vectors of Xylella spp.	Bragard, C., Dehnen-Schmutz, K., Di Serio, F., ...Czwienczek, E., MacLeod, A.	EFSA Journal	United Kingdom	2019	Q1	https://doi.org/10.2903/j.efsa.2019.5736
21	Landscape composition predicts the distribution of Philaenus spumarius, vector of Xylella fastidiosa, in olive groves	Santoiemma, Giacomo; Tamburini, Giovanni, Sanna, Francesco; Mori, Nicola; Marini, Lorenzo	Journal of Pest Science	Germany	2019	Q1	10.1007/s10340-019-01095-8
22	Status, sources and contamination levels of organochlorine pesticide residues in urban and agricultural areas: a preliminary review in central–southern Italian soils	Thiombane, Matar; Petrik, Attila; Di Bonito, Marcello; Albanese, Stefano; Zuzolo, Daniela; Cicchella, Domenico; Lima, Annamaria; Qu, Chengkai; Qi, Shihua; De Vivo, Benedetto	Environmental Science and Pollution Research	Germany	2018	Q1	10.1007/s11356-018-2688-5
23	Updated pest categorisation of Xylella fastidiosa	Jeger, Michael;Caffier, David; Candresse, Thierry; Chatzivassiliou, Elisavet; Dehnen-Schmutz, Katharina; Gilioli, Gianni;Grégoire, Jean-Claude; Jaques Miret, Josep Anton; MacLeod, Alan; Navajas Navarro, Maria; Niere, Björn; Parnell, Stephen	EFSA Journal	United Kingdom	2018	Q1	10.2903/j.efsa.2018.5357

## Sheet: Item Detail
	Title	Objective	Methodology	Used instrument	Conclusion
1	Persistence of Metarhizium brunneum (Ascomycota: Hypocreales) in the Soil Is Affected by Formulation Type as Shown by Strain-Specific DNA Markers	The present study aimed at understanding the population dynamics of M. brunneum strain EAMb 09/01-Su, which is a candidate strain for olive fruit fly Bactrocera oleae (Rossi, 1790) preimaginal control in the soil, when applied to the soil at the field using different formulations and propagules.	For this, strain-specific DNA markers were developed and used to track the levels of EAMb 09/01-Su in the soil of 4 field trials.	For this, strain-specific DNA markers were developed and used to track the levels of EAMb 09/01-Su in the soil of 4 field trials.	Overall, the present study shows that M. brunneum strain EAMb 09/01-Su can be tracked in soil samples by using strain-specific qPCR assays. These assays work as expected for OD and WP formulation prototypes, but further improvement is required to apply this method to MS formulations. Aside from the methodological contribution, it is hereby shown that EAMb 09/01-Su is able to establish in the soil…
2	Climate stressors modulate interannual olive yield at province level in Italy: A composite index approach to support crop management	We analysed aggregated olive yield data from the Italian National Statistics Institute (ISTAT) at the provincial level during 2006–2020, and several climatic variables from the Reanalysis v5 (ERA5) of the European Centre for Medium-Range Weather Forecasts (ECMWF)	markers were developed and used to track the levels of EAMb 09/01-Su in the soil of 4 field trials.	We identified exceptionally low (LY) and high (HY) yields as those being below or above the values of Z-scores of −1 and +1, respectively, namely, one unit of standard deviation. Henceforth, LY with left superscript L is used to indicate exceptionally low yield (Z-score <−1 std) and similarly H in HY to indicate exceptionally high yield (Z-score >+1 std).	The effects of single and interacting seasonal climatic-related variables as they affected the occurrence of exceptionally low yields on the broad spatial–temporal scale of Italy during 2006–2020 were explored. The composite risk index approach outlined in the text is promising in terms of predictability and interpretability as the resulting components can be identified and interpreted from an ec…
3	Pest categorisation of Nipaecoccus viridis	The EFSA Panel on Plant Health performed a pest categorisation of Nipaecoccus viridis (Hemiptera: Sternorrhyncha: Pseudococcidae), the spherical scale, for the EU.	The Panel performed the pest categorisation for N. viridis, following guiding principles and steps presented in the EFSA guidance on quantitative pest risk assessment (EFSA PLH Panel, 2018), the EFSA guidance on the use of the weight of evidence approach in scientific assessments (EFSA Scientific Committee, 2017) and the International Standards for Phytosanitary Measures No. 11 (FAO, 2013).	The EFSA Panel on Plant Health performed a pest categorisation of Nipaecoccus viridis (Hemiptera: Sternorrhyncha: Pseudococcidae), the spherical scale, for the EU	N. viridis satisfies all the criteria that are within the remit of EFSA to assess for it to be regarded as a potential Union quarantine pest (Table 8).
4	Prays oleae (Bernard), its potential predators and biocontrol depend on the structure of the surrounding landscape	The objective of our study is to investigate the effect of the landscape structure on the natural biological control of P. oleae through exploring potential relationships among the different elements involved in the trophic system, i.e., moth eggs of the carpophagous generation, moth predators, alternative preys and configuration/composition landscape features.	The study was carried out in south-eastern Madrid, Spain, where olive is one of the main rain fed crops, together with cereals and vineyards. The main olive pest problem in the area is the olive fruit fly, B. oleae, P. oleae being the second most important pest. In this area, fifteen olive groves were selected representing a landscape structure gradient according to three landscape indices: the a…	Buffer areas of radii 250, 500, 750, 1000 and 1500 m for the spatial analysis of the landscape were established around the centre of the sampled olive groves to calculate landscape structure indices (Fig. 1). The calculated indices for landscape composition were: area of olive groves (CAO), area of scrublands (CAMME), Shannon Landscape Diversity Index (SDI) and Shannon’s Evenness Index (SHEI). Bo…	This study indicates a negative effect of landscape complexity on P. oleae abundance, and biological control of the carpophagous generation could play a role in this effect. Complex landscape structure favours lacewings but not pirate bugs. This may be a masking effect by the olive psyllid, or other not addressed factors such as the vegetation ground cover. Lacewings are confirmed as predators of…
5	Socio-Economic Risks Posed by a New Plant Disease in the Mediterranean Basin	In this perspective, a study was carried out to: (a) explore the potential establishment and spread and losses caused by Xf in Euro-Mediterranean countries (i.e., France, Greece, Italy, Portugal, and Spain) and the Balkans (i.e., Albania, Bosnia and Herzegovina, Croatia, Montenegro, North Macedonia, Serbia, and Slovenia); (b) assess the potential introduction of Xf in the MENA countries (i.e., Al…	In this paper, we divided the assessment approach into two major steps: (i) the assessment of the risk of Xf’s potential establishment and spread on its main host crops, and (ii) the estimation of the potential socio-economic impacts of Xf in Euro-Mediterranean countries, in the Balkans, and in the MENA region. As such, this section is structured into three parts as follows: (i) data compilation,…	The risk assessment was performed according to the methodology developed by Cardone et al. [18] and through a specific questionnaire (Supplementary Material S1) involving experts in phytosanitary services and/or quarantine services in each target country. The questionnaire had six questions. Three different options were proposed for each question, corresponding to high, medium, or low risk, with …	The present paper constituted a first exploration of the potential impacts based on the risk level for the establishment and spread of Xf in Euro-Mediterranean countries, the Balkans and the MENA region, on Olea europaea (i.e., olives), Vitis vinifera (i.e., grapes), Citrus spp., and Prunus dulcis (i.e., almonds). The results explored in this study were only a preliminary “explorative” assessment…
6	The causes and consequences of pest population variability in agricultural landscapes	Here, we demonstrate the critical importance of PV for sustainable farming by analyzing 13 years of pest densities across >1300 Spanish olive groves and vineyards.	The Andalusian Government provided us with a large database containing pest and field-management data for 13 years (2006–2018) across Andalusia, Spain (Figure 1). This is an unusually rich data resource, as it contains detailed, long-term, and well replicated pest observations.	Our basic unit of replication was the individual field (i.e., an olive grove or grape vineyard). Fields were usually visited on a weekly basis; however, data gaps within growing seasons were common. To ensure that variation in the timing of field visits did not bias population size estimates, we only included data from visits during periods of peak pest population sizes (olive fly: mid-August to …	Despite its importance, PV is rarely studied in agricultural landscapes, let alone managed directly. One barrier is the high level of spatiotemporal replication needed to quantify interannual variability in pest populations and then relate it to field, landscape, or regional factors. A prior analysis of the grapevine moth data set demonstrated that pest population stochasticity can easily mask st…
7	Southern Range Expansion of the Emerald Ash Borer, Agrilus planipennis, in Russia Threatens Ash and Olive Trees in the Middle East and Southern Europe	The aims of this study were to determine if the southern border of the range has already reached the Caucasus and to assess the potential range in this region based on host availability and heat availability.	Surveys of Ash Trees in the Regions South to the Known Range of A. planipennis in European Russia In 2021, we surveyed ash trees in eight cities in four regions in south Russia outside the previously known range of A. planipennis, namely, in the steppe belt: Rostov region, and in the foothills of the Caucasus: Krasnodar Territory, Stavropol Territory and Republic of Dagestan. In terms of the Biod…	At least 100 trees were examined in each city. The standard method of A. planipennis detection was used [21]. We looked for ash trees with symptoms of general decline (dieback of the upper part of the stem, reduced foliage, epicormic shoots, loose bark, etc.) and examined the lower part of the stem, below 2 m, for the presence of D-shaped exit holes of A. planipennis on the bark surface. If we fo…	At present, the southernmost known localities of A. planipennis in Europe are in the steppe belt of Russia: Azov (Rostov region), Volgograd (Volgograd region) and Nikolskoe (Astrakhan region). Artificial plantings and invasive populations of F. pennsylvanica have allowed A. planipennis to establish itself in the steppe belt, where no native ash species occur. Agrilus planipennis has not been reco…
8	FUNGI OBTAINED FROM OLIVE TWIG DIEBACK AND ADULTS OF THE ALIEN PEST XYLOSANDRUS COMPACTUS (EICHHOFF) (COLEOPTERA CURCULIONIDAE SCOLYTINAE)	NO	insect sampling, identification and colonization preference In the investigated nursery tree, 4-5 years-old and three-meters-high potted olive plants were selected for the study. These trees (cypress variety for hedges) were located in a wide yard at the open-air and formed a roughly squared artificial stand. Plants were spaced at approximately 50 cm. This stand, prior to our study, had been full…	In our trial, 15 plants of this stand were randomly sampled. Specimens severely damaged by human activities (e.g. during transportation or storage activities) were excluded from the selection in order to standardize the study. All the sampled individuals were then thoroughly screened for the presence of penetration holes produced by scolytids. The diameter of the attacked plant parts in correspon…	NO
9	Measurement of CO2 Emissions in the Semi - Arid Region Conditions in the Soil where the Olive Plant Grows | [Yarı Kurak Bölge Koşullarında Zeytin Bitkisinin Yetiştiği Toprakta Karbondioksit Emisyonunun Ölçülmesi]	For this reason, in this study, it is aimed to examine and measure the factors (temperature and humidity) affecting the CO2 emission from the soil in the environments where the olive plant grows.	The research has been carried out in Harran University Eyyubiye campus in 5 sampling areas with 3 repetitions for 56 weeks in the area where the olive plant grows.	Some physical and chemical properties of the study area soils were determined. The climatic data were determined for a period of 30 minutes with the Decagon data logger (5 TE, EM50 Data Logger) installed in the study area.	It has been determined that when the soil temperature drops below 6 ºC, the amount of CO2 released from the soil is at a minimum level, and this point is the critical soil temperature point. Although the CO2 output in the research soils varies depending on the different depth, moisture and temperature amounts, the average was determined as 55.56 g CO2 m-2 weeks-1.
10	Ecological niche models of biotic interactions predict increasing pest risk to olive cultivars with changing climate	We sought to understand impacts of climate change on current and future potential distributions of Olea europaea sensu lato (host) and Bactrocera oleae (parasite) in Europe, the Middle East, and Africa (EMEA), taking into account potential interspecific interactions.	We used ecological niche modeling approaches: For biotic interactions, an initial host model was incorporated into the calibration of the parasite model and an initial parasite model was incorporated into calibration of the host model, as host and parasite populations may respond to the presence of the other species.	The initial set occurrence data were rarefied via a 10-km distance filter using the spThin R package (Aiello-Lammens et al. 2015) to reduce spatial autocorrelation, which left 2419 and 109 records for O. europaea and B. oleae, respectively.	The host model was improved by inclusion of the parasite information; the converse was not true for the parasite model. Our results anticipated a significant reduction in the potential distribution of Olea europeae in Africa and Europe under future climate scenarios; in contrast, future climates appear more broadly favorable for the parasite species, which poses new and increasing risks for olive…
11	Potential socio-economic impact of xylella fastidiosa in the near east and north africa (Nena): Risk of introduction and spread, risk perception and socio-economic effects	Therefore, a study was performed to: a) assess the risk of Xf entry, establishment and spread in target NENA countries (viz. Algeria, Egypt, Jordan, Lebanon, Libya, Morocco, Palestine, Syria, Tunisia); b) analyse risk perception and preparedness level among agri-food chain stakeholders; c) estimate potential socio-economic impacts for olives, grapes and citrus. Pest risk appraisal suggests that M…	The study implied implementing a preliminary methodological approach for each activity, as described in the following paragraphs.	Data used in the present study were secondary data from the literature (articles, books, reports) and databases as well as primary data collected through ad-hoc surveys. Indeed, the study is based on data retrieved directly from official public sources, whereas in case of lack of data recource was made to interviews (in the form of questionnaires) addressed to different actors of the agri-food sy…	The study points out that there is a high risk of entry and spread of Xf in NENA region, which would have devastating and far-reaching socio- economic impacts. The analysis also shows that the higher pest risk translates in higher potential damages. However, the high risk of Xf introduction, establishment and spread in the target NENA countries does not always correspond to a high-risk perception…
12	Is Xylella fastidiosa a serious threat to European forests?	The present review aims to address important questions related to the threat posed by X. fastidiosa to European forests, such as the following: What are the symptoms, hosts and impact of bacterial leaf scorch caused by X. fastidiosa on trees in North America? Which forest tree species have been found infected in the introduction area in Europe? How does X. fastidiosa cause disease in susceptible …	NO	NO	We conclude by pointing to important knowledge gaps related to all these questions and strongly advocate for more research about the Xylella-forest pathosystems, in both North America and Europe.
13	Resource-dependent mutual association with sap-feeders and a high predation rate in the ant Crematogaster scutellaris: help or harm in olive pest control?	We aimed to quantify the predatory action of this species and assess whether it influences the distribution of soft scale insects	Predation was investigated through experiments using live prey.	The mutualistic relationship between ants and soft scales was assessed by supplementing sugar, amino acids or water to ant colonies, then monitoring for changes in scale tending activity.	While the presence of C. scutellaris was significantly correlated to soft scale infestation, it also favoured predation towards other insects, suggesting a potential role in influencing different insect pests.
14	Distribution of Bactrocera oleae (Rossi, 1790) throughout the Iberian Peninsula based on a maximum entropy modelling approach	In this work, we built two distribution maps of B. oleae throughout the Iberian Peninsula, one based on occurrence sites and another based on its bioclimatic habitat suitability.	In this work, we built two distribution maps of B. oleae throughout the Iberian Peninsula, one based on occurrence sites and another based on its bioclimatic habitat suitability.	After modelling the bioclimatic suitability of B. oleae using a maximum entropy model, three potential distribution areas beyond the previously known occurrence range of the olive fruit fly were identified corresponding to the autonomous community of Galicia (Spain), the Spanish and Portuguese sides of the International Douro Natural Park, and the autonomous community of Castilla y León (Spain).	The drivers that most contributed to the model were the precipitation of the coldest quarter and the precipitation of driest month which agrees with the B. oleae bioecology. Although our approach is not fully-comprehensive in terms of occurrence sites, we show how a maxent modelling approach can be useful to identify potential risk areas of B. oleae occurrence throughout a target geographical ext…
15	Impact of Xylella fastidiosa subspecies pauca in European olives	We simulate future spread of the disease based on climatic-suitability modeling and radial expansion of the invaded territory.	Climatic Suitability Map. SDMs explore the relationship between geographical occurrences of species and environmental variables. Disease-Spread Simulation. Data on the olive-production sites in Europe were obtained from the CORINE land-cover map (https://land.copernicus.eu/pan-european/corine-land-cover) and aggregated to a 1-km resolution to reduce the computational time. To simulate spread, we …	An economic model is developed to compute impact based on discounted foregone profits and losses in investment.	The analysis stresses the necessity to strengthen the ongoing research on cultivar resistance traits and application of phytosanitary measures, including vector control and inoculum suppression, by removing host plants.
16	Low-cost IoT remote sensor mesh for large-scale orchard monitorization	This study presents the design and construction of a low-cost IoT sensor mesh that enables the remote measurement of parameters of large-scale orchards.	The developed remote monitoring system transmits all monitored data to a central node via LoRaWAN technology. To make the system nodes fully autonomous, the individual nodes were designed to be solar-powered and to require low energy consumption.	To improve the user experience, a web interface and a mobile application were developed, which allow the monitored information to be viewed in real-time.	The results indicate an adequate precision and reliability of the system and show that the system is fully adequate to be placed in remote orchards located at a considerable distance from networks, being able to provide real-time parameters monitoring of both tree and the surrounding environment.
17	Growth, DNA damage and biochemical toxicity of cyantraniliprole in earthworms (Eisenia fetida)	To assess the toxic impact of cyantraniliprole on earthworms, the levels of reactive oxygen species (ROS) and malondialdehyde (MDA), activities of superoxide dismutase (SOD), catalase (CAT) and glutathione S-transferase (GST)	As well as DNA damage were measured after exposed to five cyantraniliprole concentrations ranging from 0 to 10.00 mg/kg for 7, 14, 21 and 28 days	Cyantraniliprole (94% purity) was obtained from Dupont Agrochemical Co. Ltd (Shanghai, China). Earthworms (Eisenia fetida) were reared in an earthworm-breeding center in Jurong City, Jiangsu Province, China. Earthworms were arranged in a controlled artificial climate chamber at 20 ± 1 _x0003_C under a 12 h light/12 h dark photoperiod for 2 weeks and fed with cow dung. Only healthy earthworms with…	the results suggest that sub-chronic exposure to cyantraniliprole causes DNA damage and LPO, weight loss and growth inhibition, leading to antioxidant defence responses in earthworms.
18	Favourability for the presence of wild rabbit warrens in motorway verges: Implications for the spread of a native agricultural pest species	This study uses a ‘favourability function’ to model the extent to which macroecological favourable conditions for rabbits and different fine-scale variables, including environmental, anthropogenic and agricultural factors, favour the presence of rabbit warrens on the verges of a motorway network in southern IP. F	For this purpose, we collected rabbit warren locations during car transects using CyberTraker 3.0 installed in a pad along 787 km of motorways.	We surveyed rabbit warrens along a total of 787 km of the Andalusian motorway network (i.e. A49, A4, A44, A45 and A92 motorways), covering an area of approximately 13,000 km2	Our results provide strong evidence that rabbits use motorway verges, which are likely to act as dispersal corridors across landscapes. Additionally, our innovative approach, based on a rabbit warren index, the favourability function and a combination of local and macroecological predictors, could be used in many other areas where rabbits cause crop damage to make fine-scale predictions of high r…
19	Exposure of bombus terrestris l. To three different active ingredients and two application methods for olive pest control	The objective of this study was to determine the effect of three pesticide spraying solutions (α-cypermethrin, dimethoate, and spinosad) and control methods used against olive fruit flies and other olive tree pests, on adult buff-tailed bumblebees, Bombus terrestris (Hymenoptera: Apidae).	NO	NO	The results indicated that exposing worker bumblebees to environmentally realistic levels of these active ingredients in the laboratory resulted in high mortality rates of 34% (α-cypermethrin, cover spray) and 54% (α-cypermethrin, bait spray) at the end of the three-day exposure period. Bumblebees are probably at a high risk of mortality when they forage in olive groves with dry residues of a bai…
20	Pest categorisation of non-EU Cicadomorpha vectors of Xylella spp.	The Panel on Plant Health performed a group pest categorisation of non-EU Cicadomorpha vectors of Xylella spp.	The Panel performed the pest categorisation for non-EU Cicadomorpha vectors of Xylella spp. following guiding principles and steps presented in the EFSA guidance on quantitative pest risk assessment (EFSA PLH Panel, 2018b) and in the International Standard for Phytosanitary Measures No 11 (FAO, 2013) and No 21 (FAO, 2004). This work was initiated following an evaluation of the EU plant health reg…	Pest information, on host(s) and distribution, was retrieved from the European and Mediterranean Plant Protection Organization (EPPO) Global Database (EPPO, 2019), Hemiptera database, and relevant publications. Data about the import of commodity types that could potentially provide a pathway for the pests to enter the EU and about the area of hosts grown in the EU were obtained from EUROSTAT (Sta…	The group of non-EU Cicadomorpha vectors of Xylella spp. described in this categorisation meets all the criteria assessed by EFSA for consideration as potential Union quarantine pests. This group does not meet all the criteria assessed by EFSA for consideration as regulated non-quarantine pests, as the insects in this group are not present in the EU (Table 8).
21	Landscape composition predicts the distribution of Philaenus spumarius, vector of Xylella fastidiosa, in olive groves	Identifying the factors driving the spatial distribution of P. spumarius is of primary importance to determine X. fastidiosa infection risk in healthy olive groves.	We explored the efects of local and landscape factors on P. spumarius occurrence (presence/absence data) and abundance (number of adults per trap, per sampling round) with generalized linear mixed-efects models (GLMMs; binomial and negative binomial distribution, respectively). We run four models for each response variable to test the efect of landscape factors at diferent spatial scales.	Sampling took place in 182 olive groves mainly located in the eastern part of the region. The survey was carried out in 2 years, 2016 and 2017, and included, respectively, 70 and 127 groves (15 sites were monitored in both years).	Our study shows that olive groves are a key habitat for the presence and abundance of the vector in agroecosystems. Landscapes at higher elevations dominated by a matrix of olive groves are more likely to harbor populations of P. spumarius and are therefore more exposed to the risk of emergence of novel X. fastidiosa epidemics.
22	Status, sources and contamination levels of organochlorine pesticide residues in urban and agricultural areas: a preliminary review in central–southern Italian soils	This study aimed at investigating the regional distribution, possible sources and contamination levels of 24 OCP compounds in urban and rural soils from central and southern Italy	These results were also backed up by the findings of the multivariate computations performed on DDT and HCH residues, pointing out that DDT and HCH residues could be mainly related to historical but also more recent (illegal) application; occurrence of DDT residues in soils of the Campania region could be related to historical application of technical DDT; indirect evidence of illegal Bfresh^ app…	This study presented the results of a regional survey of OCP compounds conducted in urban and rural soils of 11 administrative regions from central and southern Italy, as part of an ongoing project aiming to cover the entire Italian territory	The main findings revealed the concentration of 24 OCPs, ranging from nd to 1043 ng/g (mean = 29.91 ng/g urban) and from nd to 1914 ng/g (mean of 60.16 ng/g—rural). In particular, high DDT concentrations were mostly shown in urban and rural soils of Campania and Apulia. Enrichment of HCH was also highlighted in the central regions of the study area, with relatively lower values in the northern an…
23	Updated pest categorisation of Xylella fastidiosa	Analyze X. fastidiosa is a Gram-negative bacterium, responsible for various plant diseases	The Panel performed the pest categorisation for X. fastidiosa, following the guiding principles and steps presented in the EFSA guidance on the harmonised framework for pest risk assessment (EFSA PLH Panel, 2010) and as defined in the International Standard for Phytosanitary Measures No 11 (FAO, 2013) and No 21 (FAO, 2004).	A literature search on X. fastidiosa was conducted both in 2017 and 2018. The final search was made in the Web of Science bibliographic database on 16.03.2018 in ‘All databases’ includes: all subscribed databases like: BIOSIS Citation Index, CABI: CAB Abstracts, Chinese Science Citation Database, Current Contents Connect, Data Citation Index, FSTA (the food science resource), KCI-Korean Journal D…	X. fastidiosa meets the criteria assessed by EFSA for consideration as a Union quarantine pest. The identity of the pest is clearly established. X. fastidiosa is present in EU territory, either under eradication or containment in demarcated areas, but with limited distribution. There is no doubt about the economic consequences of its presence in EU territory. Spread within EU territory following …
